# Supplementary material for: Synthesis and characterisation of magnesium substituted calcium phosphate bioceramic nanoparticles made via continuous hydrothermal flow synthesis
Source: Royal Society of Chemistry journal article supplement (doi:10.1039/b807920j), 2008-01-01
Supplement: b807920j.pdf [file b807920j.pdf]

| Sample ID | Mg (wt%) | Molarity x 10 <sup>-3</sup> |           | Mass in 100ml solution/g |           |
|-----------|----------|-----------------------------|-----------|--------------------------|-----------|
|           |          | Calcium                     | Magnesium | Calcium                  | Magnesium |
| 0.5Mg-CaP | 0.5      | 81.8                        | 1.7       | 1.93                     | 0.04      |
| 1Mg-CaP   | 1        | 80.1                        | 3.4       | 1.89                     | 0.09      |
| 1.5Mg-CaP | 1.5      | 78.4                        | 5.1       | 1.85                     | 0.13      |
| 2Mg-CaP   | 2        | 76.6                        | 6.9       | 1.81                     | 0.18      |
| 4Mg-CaP   | 4        | 70.0                        | 13.5      | 1.65                     | 0.35      |
| 6Mg-CaP   | 6        | 63.6                        | 19.9      | 1.50                     | 0.51      |
| 8Mg-CaP   | 8        | 57.3                        | 26.2      | 1.35                     | 0.67      |
| 10Mg-CaP  | 10       | 51.1                        | 32.4      | 1.21                     | 0.83      |
| 12Mg-CaP  | 12       | 45.1                        | 38.4      | 1.07                     | 0.99      |
| 14Mg-CaP  | 14       | 39.2                        | 44.3      | 0.93                     | 1.14      |
| MgP       | 28.7     | 0                           | 83.5      | 0                        | 2.14      |

**Supplementary Table 1.** Sample identification, amount of calcium nitrate and magnesium nitrate used for making solutions. The wt% of magnesium is calculated assuming a formula of  $\text{Ca}_{10-x}\text{Mg}_x(\text{PO}_4)_6(\text{OH})_2$ . The sample labeled as MgP represents a powder made using magnesium nitrate and no calcium nitrate.

| Sample ID | Yield (g) per 100ml solution | Yield (%) |
|-----------|------------------------------|-----------|
| 0.5Mg-CaP | 0.73                         | 87        |
| 1Mg-CaP   | 0.73                         | 88        |
| 1.5Mg-CaP | 0.71                         | 84        |
| 2Mg-CaP   | 0.44                         | 58        |
| 4Mg-CaP   | 0.45                         | 66        |
| 6Mg-CaP   | 0.45                         | 66        |
| 8Mg-CaP   | 0.63                         | 93        |
| 10Mg-CaP  | 0.70                         | 99        |
| 12Mg-CaP  | 0.66                         | 97        |
| 14Mg-CaP  | 0.65                         | 96        |
| MgP       | 0.62                         | 99        |

**Supplementary Table 2.** Yields of product obtained in the continuous hydrothermal flow synthesis system using a superheated water feed at 400 °C and 24 MPa. Yields were calculated using the formula  $\text{Ca}_{10}(\text{PO}_4)_6(\text{OH})_2$  for samples 0.5Mg-CaP, 1.0Mg-CaP and 1.5Mg-CaP. The remaining yields except that for MgP, were calculated using the formula  $\text{Ca}_3(\text{PO}_4)_2$ . MgP yield was calculated on the basis of the formula  $\text{Mg}_2\text{P}_2\text{O}_7$ .

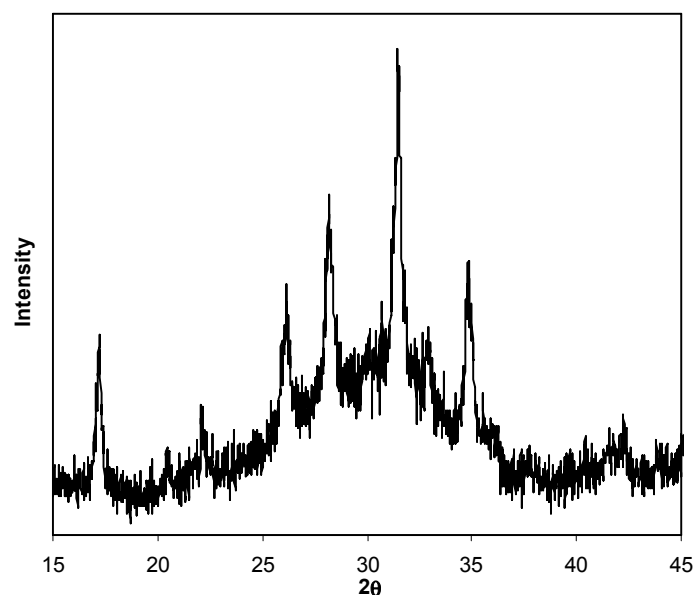

**Supplementary Figure 1.** X-Ray powder diffraction patterns of sample 10Mg-CaP made in a continuous hydrothermal flow synthesis system using a superheated water feed at 450 °C and 24 MPa (with a band heater at 450 °C).

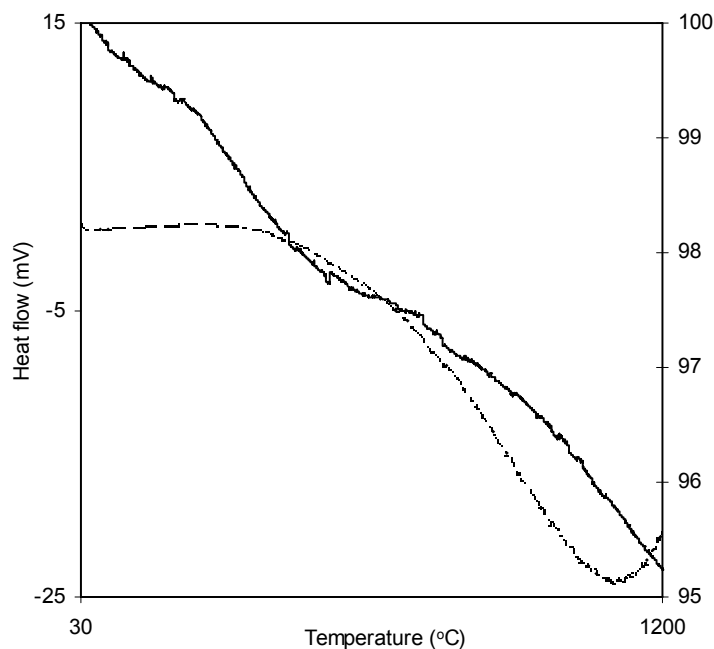

**Supplementary Figure 2.** Thermogravimetric analysis and differential scanning calorimetry plots in the range 30 – 1200 °C (in air) for sample 0.5Mg-CaP

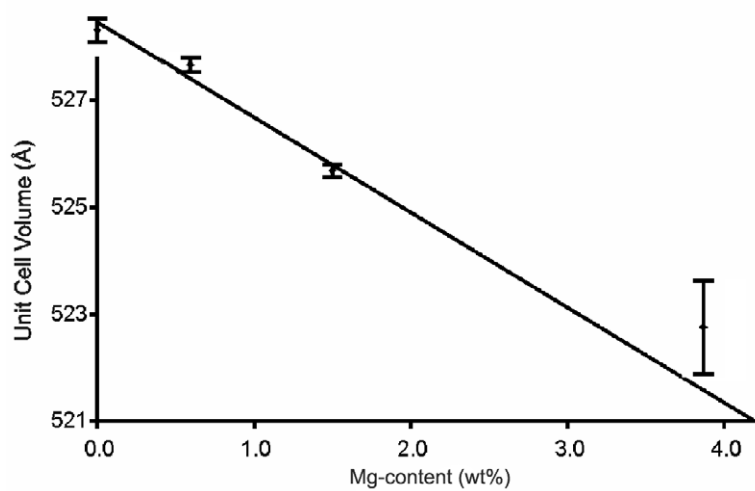

**Supplementary Figure 3.** Plot of magnesium content (measured using EDS) against the refined unit cell volume of hydroxyapatite. The linear fit shown is weighted according to the errors on the refined parameters.
